# Supplementary material for: Adaptation of the late ISC pathway in the anaerobic mitochondrial organelles of Giardia intestinalis
Source: PubMed Central journal article supplement (PMC10578589; doi:10.1371/journal.ppat.1010773), 2023-10-04

## Supplementary Figure 2

### cellular fractions

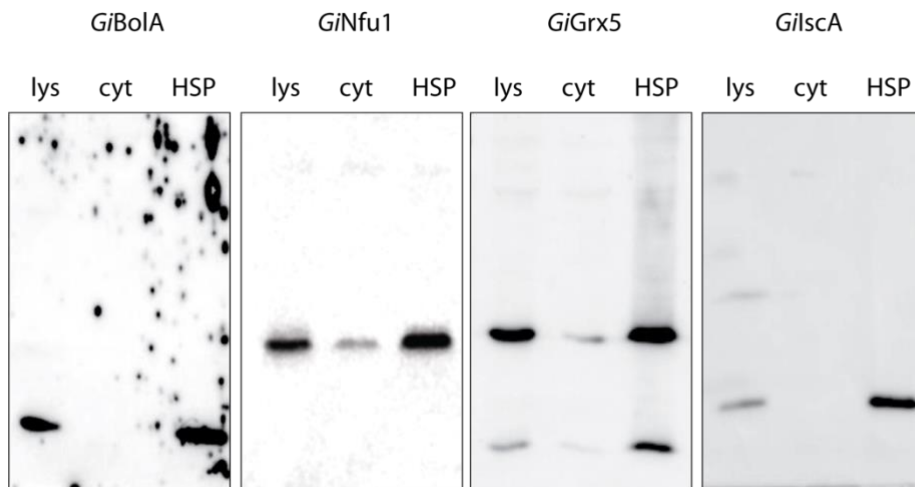

### protease protection assay

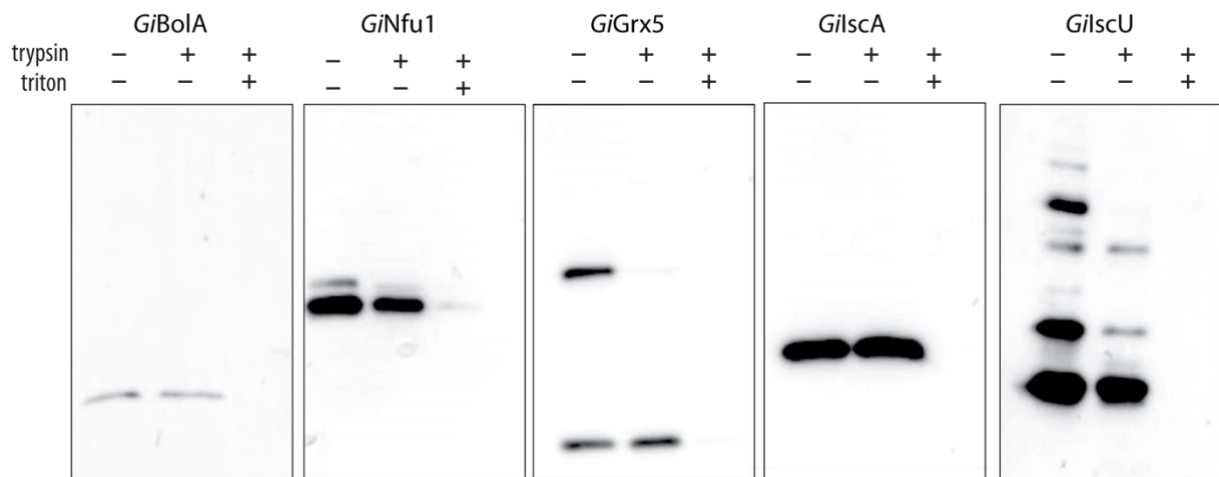

*GiTom40*  
trypsin - + +  
triton - - +

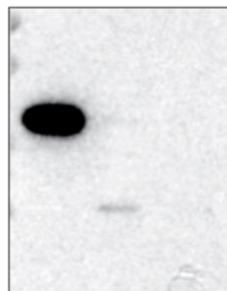

Supplement: ppat.1010773.s002.pdf [file ppat.1010773.s002.pdf]
