# Supplementary material for: Adaptation of the late ISC pathway in the anaerobic mitochondrial organelles of Giardia intestinalis
Source: PubMed Central journal article supplement (PMC10578589; doi:10.1371/journal.ppat.1010773), 2023-10-04
Supplement: ppat.1010773.s003.pdf [file ppat.1010773.s003.pdf]

### Supplementary Figure 3

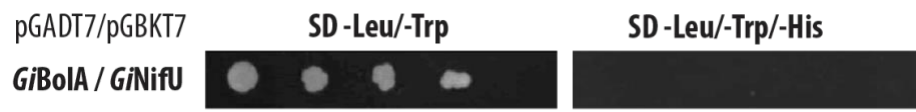

OK
