# Supplementary material for: Adaptation of the late ISC pathway in the anaerobic mitochondrial organelles of Giardia intestinalis
Source: PubMed Central journal article supplement (PMC10578589; doi:10.1371/journal.ppat.1010773), 2023-10-04

## Supplementary Figure 4

$\Delta$ bolA

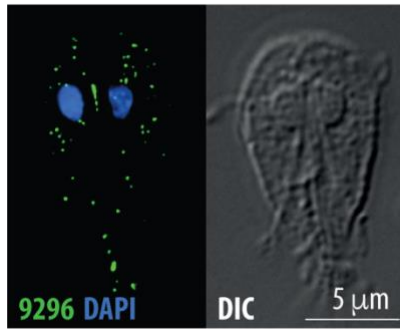

control

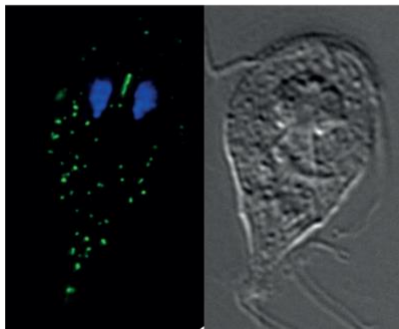

Supplement: ppat.1010773.s004.pdf [file ppat.1010773.s004.pdf]
