# Supplementary material for: Adaptation of the late ISC pathway in the anaerobic mitochondrial organelles of Giardia intestinalis
Source: PubMed Central journal article supplement (PMC10578589; doi:10.1371/journal.ppat.1010773), 2023-10-04

Supplementary Figure 5

A

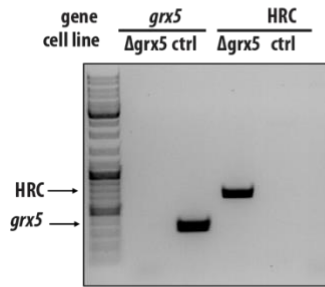

B

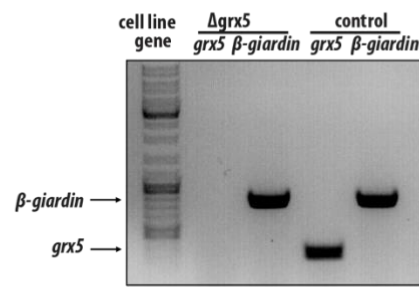

C

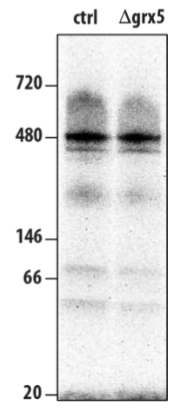

Supplement: ppat.1010773.s005.pdf [file ppat.1010773.s005.pdf]
